# Supplementary material
Source: publisher figshare collection journal article supplement (https://sage.figshare.com/ndownloader/files/21239814)
Supplement: Supplementary file 1 [file 21239814]

**Online Supplementary Material**  
**Legislative Bargaining and Partisan Delegation**

Here, we provide the *Mathematica* Notebook that was used to help prove Proposition 3.

## ? D

$D[f, x]$  gives the partial derivative  $\partial f / \partial x$ .

$D[f, \{x, n\}]$  gives the multiple derivative  $\partial^n f / \partial x^n$ .

$D[f, x, y, \dots]$  differentiates  $f$  successively with respect to  $x, y, \dots$

$D[f, \{\{x_1, x_2, \dots\}\}]$  for a scalar  $f$  gives the vector derivative  $(\partial f / \partial x_1, \partial f / \partial x_2, \dots)$ .

$D[f, \{array\}]$  gives a tensor derivative. >>

## ? Reduce

$\text{Reduce}[expr, vars]$  reduces the statement  $expr$  by solving equations or inequalities for  $vars$  and eliminating quantifiers.

$\text{Reduce}[expr, vars, dom]$  does the reduction over

the domain  $dom$ . Common choices of  $dom$  are Reals, Integers, and Complexes. >>

### To differentiate the $\delta$ bound in $\alpha$ :

$$\text{Simplify}\left[D\left[\frac{2 \left((3 \Pi - 1) \alpha - 1\right)}{(1 + \alpha) (\Pi (2 + \alpha) - 2)}, \alpha\right]\right]$$

$$\frac{2 \Pi (-5 + 2 \alpha + \alpha^2 (1 - 3 \Pi) + 6 \Pi)}{(1 + \alpha)^2 (-2 + (2 + \alpha) \Pi)^2}$$

$$\text{Reduce}\left[\left\{D\left[\frac{2 \left((3 \Pi - 1) \alpha - 1\right)}{(1 + \alpha) (\Pi (2 + \alpha) - 2)}, \alpha\right] > 0, \frac{1}{3 \Pi - 1} < \alpha < 1, \frac{2}{3} < \Pi \leq 1\right\}, \alpha\right]$$

$$\frac{2}{3} < \Pi \leq 1 \ \&\& \ \frac{1}{-1 + 3 \Pi} < \alpha < 1$$

### To differentiate the $\delta$ bound in $\Pi$ :

$$\text{Factor}\left[D\left[\frac{2 \left((3 \Pi - 1) \alpha - 1\right)}{(1 + \alpha) (\Pi (2 + \alpha) - 2)}, \Pi\right]\right]$$

$$\frac{2 (-2 + \alpha) (-1 + \alpha)}{(1 + \alpha) (-2 + 2 \Pi + \alpha \Pi)^2}$$

$$\text{Reduce}\left[\left\{D\left[\frac{2 \left((3 \Pi - 1) \alpha - 1\right)}{(1 + \alpha) (\Pi (2 + \alpha) - 2)}, \Pi\right] > 0, \frac{1}{3 \Pi - 1} < \alpha < 1, \frac{2}{3} < \Pi \leq 1\right\}, \alpha\right]$$

$$\frac{2}{3} < \Pi \leq 1 \ \&\& \ \frac{1}{-1 + 3 \Pi} < \alpha < 1$$
